# Supplementary material for: Pharmacological Inhibition of CETP (Cholesteryl Ester Transfer Protein) Increases HDL (High-Density Lipoprotein) That Contains ApoC3 and Other HDL Subspecies Associated With Higher Risk of Coronary Heart Disease
Source: PubMed Central journal article supplement — Arterioscler Thromb Vasc Biol. 2021 Dec 23;42(2):227–37. doi: 10.1161/ATVBAHA.121.317181 (PMC8785774; doi:10.1161/atvbaha.121.317181), 2021-12-23
Supplement: atv-42-227-s001.pdf [file atv-42-227-s001.pdf]

## Supplemental Material

Table of Contents

|                            |        |
|----------------------------|--------|
| Supplemental Methods.....  | Page 2 |
| Supplemental Table S1..... | Page 3 |
| Supplemental Table S2..... | Page 4 |
| Major Resources Table..... | Page 7 |

## Supplemental Methods:

**STUDY POPULATION.** The ACCENTUATE trial (supported by Eli Lilly and Company, ClinicalTrials.gov Identifier: NCT02227784) was a Phase 3 randomized clinical trial designed to evaluate the effects of evacetrapib on HDL cholesterol and other lipids in participants with high cholesterol and atherosclerotic cardiovascular disease (ASCVD) and/or diabetes. The inclusion criteria required participants to be over 18 years of age, diagnosed with atherosclerotic cardiovascular disease or diabetes mellitus (type 1 or type 2), have elevated LDL (>70mg/dL) or non-HDL (>100mg/dL) cholesterol, triglyceride  $\leq$ 400mg/dL, and be treated with atorvastatin 40mg daily for at least 30 days prior to screening. Participants were excluded for recent stroke or acute coronary syndrome, uncontrolled hypertension, documented hyperaldosteronism, uncontrolled diabetes, malignancy, or significant liver, kidney, or cardiac disease. Following a 28-day lead-in period of atorvastatin 40mg daily, 366 eligible participants were randomized to four treatment arms (2:1:1:2): 123 assigned to evacetrapib 130mg and atorvastatin 40mg, 54 assigned to atorvastatin 40mg, 62 assigned to atorvastatin 80mg, and 127 assigned to ezetimibe 10mg and atorvastatin 40mg. Our study compared all of the subjects included in the final efficacy analysis from two of these treatment arms: atorvastatin 40mg and evacetrapib 130mg daily (n=86); and atorvastatin 40mg and placebo evacetrapib (n=40) daily.

The ILLUMINATE trial (supported by Pfizer, ClinicalTrials.gov Identifier: NCT00134264) was a Phase 3 randomized controlled trial designed to demonstrate if torcetrapib plus atorvastatin could reduce the risk for major cardiovascular disease events compared to atorvastatin alone in patients with coronary heart disease or risk equivalents. The inclusion criteria required participants to be 45 to 75 years of age and diagnosed with cardiovascular disease or type 2 diabetes 30 days to 5 years before screening. Exclusion criteria included unstable medical condition, life expectancy <5yrs, LDL cholesterol <100mg/dL

in patients not receiving lipid-altering medication, cardiovascular event or hypertension during run in, or if the LDL cholesterol target was not reached by the end of run-in. During a 4 to 10 week run-in period, atorvastatin was administered at four levels determined by the minimum required dose to achieve the LDL cholesterol target of <100mg/dL. Those who met this target were randomized to continue their regimen of atorvastatin with the addition of either torcetrapib 60mg daily (n=7526) or placebo-torcetrapib (n=7528). From these participants, our study randomly selected 20 men and 20 women from the atorvastatin 10mg + torcetrapib 60mg daily dose group and an additional 40 participants from the atorvastatin 10mg group + placebo torcetrapib who were matched on sex, race, and age (within 1 year).

**LABORATORY ANALYSIS.** Stored plasma samples from the ACCENTUATE trial of evacetrapib and the ILLUMINATE trial of torcetrapib collected at baseline and after three months were shipped on dry ice by overnight courier to the Harvard T.H. Chan School of Public Health and stored at -80°C pending analysis. Samples were thawed at room temperature and gently swirled to ensure homogeneity. Modified sandwich ELISAs to quantify the concentrations of apoA1 in the 17 HDL subspecies defined by selected proteins were performed as described in detail previously. Briefly, samples were diluted in phosphate-buffered saline and loaded into 16 prepared 96-well microplates, each one coated with a different antibody corresponding to the 16 subspecies-defining proteins. Following overnight incubation at 4°C, the unbound fraction depleted of the HDL subspecies that contains the defining protein was removed. Of all the unbound fractions produced, only the unbound fraction from the anti-apoA2 plate was measured. This was recorded as the apoA1 concentration of “HDL that lacks apoA2”. This fraction was measured because unlike the other protein-defined HDL subspecies, HDL that contains apoA2 makes up the majority fraction of HDL (~80%) while HDL that lacks apoA2 is the minority fraction. The plates were washed gently three times with PBS, then loaded with tween-containing diluent and incubated for 1hr at 37°C to dissociate the lipoprotein complexes bound to the plate. The dissociated sample was transferred

to a prepared 96-well microplate coated with anti-apoA1 antibody, one per HDL subspecies plus one more for the HDL lacking apoA2. The 17 plates were incubated for 1hr at 37°C, then washed three times. Biotinylated anti-apoA1 was loaded, plates were incubated and washed, streptavidin was added, plates were incubated and washed, and finally o-phenylenediamine substrate was added and incubated in the dark (all incubations at 37°C for 1hr). To minimize batch effects, baseline and 3-month samples were paired side-by side in the same ELISA plate in random order and CETP-treated and untreated samples were alternated with equal numbers on each ELISA plate. The lab was blinded to time point and treatment status. In all cases, ELISAs were judged on the quality of the calibration curve, the correlation of obtained and expected values of the control samples (required  $r > 0.7$ ), and the coefficients of variation for the unknown samples. Extreme outliers could be removed from calibration curves, but curves had to be produced from at least 4 of the 7 calibration curve points and show a fit of  $r^2 > 0.95$ . The average coefficient of variation (%CV) for all replicate samples could not exceed 15% for a plate to be accepted. Individual replicates whose %CV exceeded 20% were repeated.

**Supplemental Table S1.** Effects of evacetrapib. Median apoA1 concentration (mg/dL) of total plasma and of protein-defined HDL subspecies at baseline and after placebo or evacetrapib treatment with interquartile range, median change from baseline, and percent change from baseline. IQR – interquartile range. \*FDR-adjusted p-value <0.05 for the comparison of the effect of placebo to evacetrapib.

|                      |                       | pre-treatment |            | post-treatment |             | median | median   |
|----------------------|-----------------------|---------------|------------|----------------|-------------|--------|----------|
|                      |                       | median        | IQR        | median         | IQR         | change | % change |
| <b>evacetrapib</b>   |                       |               |            |                |             |        |          |
| total plasma apoA1   |                       | 131           | 105-166    | 212            | 185-268     | 84 *   | 65 *     |
| HDL that lacks apoA2 |                       | 36            | 28-50      | 62             | 45-91       | 24 *   | 72 *     |
| HDL that contains    | apoA2                 | 95            | 76-123     | 149            | 128-181     | 55 *   | 59 *     |
|                      | alpha-1-antitrypsin   | 9.58          | 5.36-17.37 | 12.46          | 8.15-22.09  | 2.49 * | 48 *     |
|                      | alpha-2-macroglobulin | 2.06          | 1.24-3.49  | 2.65           | 1.98-3.83   | 0.50 * | 27 *     |
|                      | apoA4                 | 2.84          | 2.15-4.54  | 5.14           | 4.14-6.67   | 2.09 * | 76 *     |
|                      | apoC1                 | 11.92         | 7.06-16.43 | 21.20          | 12.98-28.31 | 7.51 * | 79 *     |
|                      | apoC2                 | 1.28          | 0.87-2.03  | 1.89           | 1.35-2.49   | 0.54 * | 46 *     |
|                      | apoC3                 | 5.75          | 3.79-9.74  | 11.77          | 7.58-17.52  | 5.16 * | 93 *     |
|                      | complement C3         | 2.99          | 1.79-6.14  | 4.33           | 2.50-6.42   | 0.87 * | 27 *     |
|                      | ceruloplasmin         | 1.33          | 0.90-2.42  | 1.76           | 1.19-2.64   | 0.32 * | 27 *     |
|                      | apoE                  | 7.98          | 5.22-13.18 | 16.73          | 10.20-25.61 | 7.97 * | 91 *     |
|                      | fibrinogen            | 2.37          | 1.49-3.92  | 3.29           | 2.62-4.54   | 0.88 * | 38 *     |
|                      | haptoglobin           | 1.81          | 1.17-2.83  | 2.10           | 1.48-2.93   | 0.31 * | 17 *     |
|                      | apoJ                  | 1.73          | 1.16-2.67  | 2.31           | 1.78-3.20   | 0.61 * | 40 *     |
|                      | apoL1                 | 3.28          | 2.33-4.75  | 3.57           | 3.10-4.43   | 0.36   | 10       |
| plasminogen          | 3.11                  | 1.93-5.77     | 4.36       | 3.28-5.64      | 0.70 *      | 30 *   |          |
| paraoxonase-1        | 8.51                  | 6.43-13.71    | 10.89      | 8.63-14.17     | 2.20 *      | 27 *   |          |
| <b>placebo</b>       |                       |               |            |                |             |        |          |
| total plasma apoA1   |                       | 139           | 98-169     | 144            | 116-183     | 5      | 4        |
| HDL that lacks apoA2 |                       | 40            | 26-56      | 42             | 31-53       | -1     | -4       |
| HDL that contains    | apoA2                 | 103           | 59-123     | 100            | 76-132      | 13     | 16       |
|                      | alpha-1-antitrypsin   | 8.60          | 5.72-16.46 | 8.42           | 6.26-12.10  | -1.89  | -21      |
|                      | alpha-2-macroglobulin | 1.86          | 1.47-2.96  | 1.94           | 1.49-2.83   | -0.08  | -5       |
|                      | apoA4                 | 2.83          | 2.25-3.83  | 3.06           | 2.18-3.91   | 0.11   | 5        |
|                      | apoC1                 | 12.18         | 8.19-18.23 | 12.80          | 7.48-18.87  | 0.77   | 8        |
|                      | apoC2                 | 1.38          | 0.99-1.75  | 1.24           | 0.91-1.77   | -0.07  | -8       |
|                      | apoC3                 | 6.52          | 4.17-7.80  | 6.06           | 4.42-8.11   | -0.25  | -6       |
|                      | complement C3         | 2.66          | 1.83-5.34  | 2.92           | 1.59-4.88   | -0.18  | -3       |
|                      | ceruloplasmin         | 1.25          | 0.91-1.78  | 1.21           | 0.91-1.56   | -0.16  | -14      |
|                      | apoE                  | 7.69          | 5.84-11.95 | 8.11           | 4.99-13.32  | 0.55   | 6        |
|                      | fibrinogen            | 2.59          | 1.74-3.41  | 2.57           | 1.71-3.52   | -0.15  | -5       |
|                      | haptoglobin           | 1.83          | 0.92-2.85  | 1.55           | 1.04-2.42   | -0.26  | -16      |
|                      | apoJ                  | 1.74          | 1.31-2.13  | 1.56           | 1.25-2.00   | -0.12  | -8       |
|                      | apoL1                 | 3.02          | 2.36-3.82  | 3.02           | 2.38-3.75   | -0.06  | -2       |
| plasminogen          | 3.02                  | 2.23-4.21     | 2.62       | 1.80-3.50      | -0.40       | -13    |          |
| paraoxonase-1        | 8.28                  | 6.03-11.74    | 8.13       | 6.87-10.72     | 0.03        | 0      |          |

**Supplemental Table S2.** Effects of torcetrapib. Median apoA1 concentration (mg/dL) of total plasma and of protein-defined HDL subspecies at baseline and after placebo or torcetrapib treatment with interquartile range, median change from baseline, and percent change from baseline. IQR – interquartile range. \*FDR-adjusted p-value <0.05 for the comparison of the effect of placebo to torcetrapib.

|                           |                       | pre-treatment |             | post-treatment |             | median | median   |
|---------------------------|-----------------------|---------------|-------------|----------------|-------------|--------|----------|
|                           |                       | median        | IQR         | median         | IQR         | change | % change |
| <b><i>torcetrapib</i></b> |                       |               |             |                |             |        |          |
| total plasma apoA1        |                       | 143           | 124-183     | 196            | 159-225     | 37 *   | 27 *     |
| HDL that lacks apoA2      |                       | 29            | 23-48       | 47             | 33-58       | 10 *   | 36 *     |
| HDL that contains         | apoA2                 | 114           | 100-143     | 149            | 121-165     | 29 *   | 28 *     |
|                           | alpha-1-antitrypsin   | 10.47         | 6.09-23.61  | 15.33          | 8.31-28.21  | 1.61   | 20       |
|                           | alpha-2-macroglobulin | 2.19          | 1.48-3.32   | 3.13           | 2.09-4.48   | 0.74   | 46       |
|                           | apoA4                 | 3.55          | 2.61-4.07   | 4.68           | 3.48-5.36   | 0.73   | 23       |
|                           | apoC1                 | 13.08         | 9.60-16.11  | 19.12          | 13.68-23.32 | 4.75 * | 45 *     |
|                           | apoC2                 | 2.03          | 1.25-2.81   | 2.45           | 1.57-3.07   | 0.40   | 26       |
|                           | apoC3                 | 6.70          | 4.57-7.91   | 9.24           | 7.87-13.70  | 2.66 * | 49 *     |
|                           | complement C3         | 3.20          | 2.41-4.75   | 4.00           | 3.06-5.75   | 0.70   | 26       |
|                           | ceruloplasmin         | 1.24          | 0.95-1.87   | 1.70           | 1.08-2.60   | 0.39   | 32       |
|                           | apoE                  | 10.21         | 6.15-13.28  | 14.08          | 10.20-22.20 | 3.61 * | 42 *     |
|                           | fibrinogen            | 3.09          | 2.09-3.76   | 3.44           | 2.31-4.28   | 0.54   | 17       |
|                           | haptoglobin           | 1.72          | 1.33-2.44   | 2.10           | 1.68-2.67   | 0.26   | 13       |
|                           | apoJ                  | 1.43          | 1.18-2.03   | 1.91           | 1.63-2.46   | 0.43   | 31 *     |
|                           | apoL1                 | 2.71          | 2.38-3.47   | 3.21           | 2.77-3.75   | 0.27   | 9        |
| plasminogen               | 3.72                  | 2.52-5.26     | 4.14        | 3.60-5.51      | 0.69        | 27     |          |
| paraoxonase-1             | 9.39                  | 7.25-11.88    | 9.81        | 8.10-14.62     | 1.24        | 17     |          |
| <b><i>placebo</i></b>     |                       |               |             |                |             |        |          |
| total plasma apoA1        |                       | 142           | 118-164     | 139            | 124-157     | -5     | -3       |
| HDL that lacks apoA2      |                       | 32            | 25-39       | 31             | 26-38       | -1     | -2       |
| HDL that contains         | apoA2                 | 108           | 91-125      | 108            | 96-122      | -1     | -0.5     |
|                           | alpha-1-antitrypsin   | 9.14          | 5.75-13.57  | 12.80          | 7.54-19.35  | 1.43   | 15       |
|                           | alpha-2-macroglobulin | 2.21          | 1.88-3.53   | 2.78           | 1.70-3.63   | 0.00   | 2        |
|                           | apoA4                 | 3.01          | 2.28-4.43   | 3.61           | 2.62-4.87   | 0.34   | 13       |
|                           | apoC1                 | 13.35         | 10.37-15.53 | 12.35          | 9.96-15.59  | 0.57   | 5        |
|                           | apoC2                 | 1.82          | 1.48-2.30   | 2.30           | 1.38-2.59   | 0.22   | 12       |
|                           | apoC3                 | 6.15          | 4.78-8.67   | 6.19           | 4.81-8.57   | -0.10  | -2       |
|                           | complement C3         | 3.37          | 2.73-4.30   | 3.54           | 2.51-6.05   | 0.19   | 7        |
|                           | ceruloplasmin         | 1.53          | 0.93-1.96   | 1.90           | 1.00-2.71   | 0.32   | 26       |
|                           | apoE                  | 8.22          | 5.70-13.53  | 8.05           | 5.82-14.80  | 0.26   | 2        |
|                           | fibrinogen            | 2.37          | 1.88-3.55   | 3.22           | 2.08-3.65   | 0.28   | 12       |
|                           | haptoglobin           | 1.72          | 1.05-2.18   | 1.58           | 1.17-2.57   | 0.04   | 5        |
|                           | apoJ                  | 1.50          | 1.19-1.77   | 1.49           | 1.08-2.24   | -0.02  | -1       |
|                           | apoL1                 | 2.79          | 2.50-3.42   | 3.16           | 2.71-3.71   | 0.20   | 7        |
| plasminogen               | 3.33                  | 2.22-4.85     | 3.87        | 2.90-5.30      | 0.32        | 12     |          |
| paraoxonase-1             | 8.88                  | 7.14-13.06    | 9.87        | 7.39-14.85     | -0.06       | -1     |          |

## Major Resources Table

In order to allow validation and replication of experiments, all essential research materials listed in the Methods should be included in the Major Resources Table below. Authors are encouraged to use public repositories for protocols, data, code, and other materials and provide persistent identifiers and/or links to repositories when available. Authors may add or delete rows as needed.

**Animals (in vivo studies): not applicable**

**Genetically Modified Animals: not applicable**

### Antibodies

| Protein               | Coating Antibody                                                                     | Detection Antibody                                                                                    |
|-----------------------|--------------------------------------------------------------------------------------|-------------------------------------------------------------------------------------------------------|
| ApoA-I                | Goat Polyclonal Anti-Human ApoA-I,<br>Academy Biomedical<br>(#11A-G2b, 5 ug/mL)      | Goat Polyclonal Anti-Human ApoA-I Biotin conjugate,<br>Academy Biomedical<br>(#11B-G2b, 1 ug/mL)      |
| alpha-1-antitrypsin   | Rabbit Polyclonal Anti-Human A1AT,<br>NOVUS<br>(#NBP1-78098, 2 ug/mL)                | Rabbit Polyclonal Anti-Human A1AT,<br>NOVUS (HRP conjugate prepared in lab)<br>(#NBP1-78098, 1 ug/mL) |
| alpha-2-macroglobulin | Goat Polyclonal Anti-Human A2M,<br>Thermo Fisher Scientific<br>(#PA1-74010, 2 ug/mL) | Goat Polyclonal Anti-Human A2M Biotin conjugate,<br>Thermo Fisher Scientific<br>(#PA1-28857, 1 ug/mL) |
| ApoA-II               | Goat Polyclonal Anti-Human ApoA-II,<br>Academy Biomedical<br>(#12A-G1b, 5 ug/mL)     | Goat Polyclonal Anti-Human ApoA-II HRP conjugate,<br>Academy Biomedical<br>(#12H-G2b, 1 ug/mL)        |
| apoA-IV               | Rabbit Polyclonal Anti-Human apoA-IV<br>Proteintech<br>(#17996-1-AP, 2 ug/mL)        | Rabbit Polyclonal Anti-Human apoA-IV<br>Millipore<br>(#SPR687CA, 1 ug/mL)                             |
| ApoC-I                | Goat Polyclonal Anti-Human ApoC-I,<br>Academy Biomedical<br>(#31A-G1b, 5 ug/mL)      | Goat Polyclonal Anti-Human ApoC-I HRP conjugate,<br>Academy Biomedical<br>(#31H-G1b, 1 ug/mL)         |
| ApoC-II               | Goat Polyclonal Anti-Human ApoC-II,<br>Academy Biomedical<br>(#32A-G1b, 2 ug/mL)     | Goat Polyclonal Anti-Human ApoC-II HRP conjugate,<br>Academy Biomedical<br>(#32H-G4b, 1 ug/mL)        |
| ApoC-III              | Goat Polyclonal Anti-Human ApoC-III,<br>Academy Biomedical<br>(#33A-G1b, 5 ug/mL)    | Goat Polyclonal Anti-Human ApoC-III HRP conjugate,<br>Academy Biomedical<br>(#33H-G2b, 1 ug/mL)       |
| ApoE                  | Goat Polyclonal Anti-Human ApoE,<br>Academy Biomedical<br>(#50H-G1b, 10 µg/mL)       | Goat Polyclonal Anti-Human ApoE HRP conjugate,<br>Academy Biomedical<br>(#50S-G1b, 1 ug/mL)           |

|                                                     |                                                                                               |                                                                                                                                  |
|-----------------------------------------------------|-----------------------------------------------------------------------------------------------|----------------------------------------------------------------------------------------------------------------------------------|
| ApoJ                                                | Mouse Monoclonal Anti-Human ApoJ,<br>R&D Systems<br>(#MAB29372, 3 ug/mL)                      | Mouse Monoclonal Anti-Human ApoJ Biotin conjugate,<br>R&D Systems<br>(#BAM29373, 1 ug/mL)                                        |
| apoL-I                                              | Rabbit Polyclonal Anti-Human apoL-I<br>Proteintech<br>(#11486-2-AP, 5 ug/mL)                  | Rabbit Polyclonal Anti-Human apoL-I (Biotin conjugate prepared in lab)<br>Proteintech<br>(#11486-2-AP, 1 ug/mL)                  |
| Plasminogen                                         | Goat Polyclonal Anti-Human Plasminogen,<br>Academy Biomedical<br>(#PG60A-G1b, 2 ug/mL)        | Goat Polyclonal Anti-Human Plasminogen HRP conjugate,<br>Academy Biomedical<br>(#PG60H-G1a, 1 ug/mL)                             |
| fibrinogen ( $\alpha$ , $\beta$ , $\gamma$ -chains) | Chicken Polyclonal Anti-Human Fibrinogen<br>Thermo Fisher Scientific<br>(#PA1-9526, 1 ug/mL)  | Chicken Polyclonal Anti-Human Fibrinogen (Biotin conjugate prepared in lab)<br>Thermo Fisher Scientific<br>(#PA1-9526, 1 ug/mL)  |
| complement C3                                       | Goat Polyclonal Anti-Human Complement C3<br>Thermo Fisher Scientific<br>(#PA1-29715, 5 ug/mL) | Goat Polyclonal Anti-Human Complement C3 (Biotin conjugate prepared in lab)<br>Thermo Fisher Scientific<br>(#PA1-29715, 1 ug/mL) |
| ceruloplasmin                                       | Rabbit Polyclonal Anti-Human Ceruloplasmin<br>LifeSpan BioSciences<br>(#LS-C147360, 2 ug/mL)  | Rabbit Polyclonal Anti-Human Ceruloplasmin (HRP conjugate made in lab)<br>LifeSpan BioSciences<br>(#LS-C147360, 1 ug/mL)         |
| haptoglobin                                         | Goat Polyclonal Anti-Human Haptoglobin<br>LifeSpan BioSciences<br>(#LS-B13232, 2 ug/mL)       | Goat Polyclonal Anti-Human Haptoglobin (HRP conjugate made in lab)<br>LifeSpan BioSciences<br>(#LS-B13232, 1 ug/mL)              |
| paraoxonase-1                                       | Goat Polyclonal Anti-Human PON-1<br>LifeSpan BioSciences<br>(#LS-C188035, 5 ug/mL)            | Goat Polyclonal Anti-Human PON-1 (Biotin conjugate prepared in lab)<br>LifeSpan BioSciences<br>(#LS-C188035, 1 ug/mL)            |

**DNA/cDNA Clones: not applicable**

**Cultured Cells: not applicable**

#### Data & Code Availability

| Description                                                     | Source / Repository | Persistent ID / URL |
|-----------------------------------------------------------------|---------------------|---------------------|
| available from the corresponding author upon reasonable request |                     |                     |

**Other: not applicable**
